# Supplementary material for: Clinical impact of monocyte distribution width and neutrophil-to-lymphocyte ratio for distinguishing COVID-19 and influenza from other upper respiratory tract infections: A pilot study
Source: PLOS journal article supplement (doi:10.1371/journal.pone.0241262), 2020-11-02
Supplement: S1 (10.1371/journal.pone.0241262.s001) [file journal.pone.0241262.s001]

## Sheet: 工作表1
case sequence	triage	gender	age	icd10_code1	中文診斷1	icd10_code2	中文診斷2	icd10_code3	中文診斷3	SBP	DBP	MAP	HR	RR	SI	BT	SpO2	Height	Weight	BMI	Travel	Fever	Cough	Rhinorrhea	Sorethroat	Dyspnea	Nausea	Diarrhea	olfactory or taste abnoraml	Malaise	DM	HTN	WBC	Hct	Plt	N	L	PLR	NLR	MDW	CRP	AST	ALT	AST/ALT (SLR)	Cr	CXR(PN)	COVID-19	Flu
1	3	F	6	J02.9	急性咽炎	J03.90	急性扁桃腺炎					0			#DIV/0!	38.7				#DIV/0!	1	1	1	0	0	0	0	0	0	0	0	0	4980	38.3		49.8	31.7	0	1.57098	26.2	0.1	32	9	3.55556	0.6	0	0	0
2	3	F	14	J18.0	支氣管肺炎，未明示病原體	K52.9	非傳染性胃腸炎及結腸炎			106	69	81.3333	83	18	0.783019	36.6	100	153	48	20.5049	1	1	0	0	0	0	0	1	0	0	0	0	8440	36.8	184	72.8	13.7	13.4307	5.31387	23.9	1.15	19	12	1.58333	0.4	0	0	0
3	3	F	52	J45.901	氣喘併(急性)發作	R05	咳嗽	J30.9	過敏性鼻炎	149	91	110.333	111	18	0.744966	37.6	100	163	69	25.9701	0	1	1	1	1	0	0	0	0	1	0	1	8210	43.2	248	60.6	30.8	8.05195	1.96753	20.3	0.58	35	26	1.34615	0.7	0	0	0
4	3	M	3	K29.00	急性胃炎未伴有出血	J15.7	肺炎黴漿菌所致之肺炎					0			#DIV/0!	36.4				#DIV/0!	0	0	1	0	0	0	1	0	0	0	0	0	10160	33.7	323	39.1	46.6	6.93133	0.839056	26.7	1.48	29	18	1.61111	0.3	0	0	0
5	3	F	6	R50.9	發燒	R05	咳嗽					0			#DIV/0!	36.2		111	18.5	15.015	1	1	1	1	0	0	0	0	0	0	0	0	4290	37		28.6	46.4	0	0.616379	19.6	0.28	31	17	1.82353	0.5	0	0	0
6	3	M	83	R50.9	發燒					134	61	85.3333	55	20	0.410448	38.3	98	176	75	24.2123	1	1	0	0	0	0	0	0	0	1	0	1	24200	40.7	240	89.2	2.5	96	35.68	18.6	0.72		41		1.4	1	0	0
7	2	M	72	J15.9	細菌性肺炎	J96.90	呼吸衰竭，未指明是否伴有缺氧或高碳酸血症			119	76	90.3333	103	16	0.865546	36.9	92			#DIV/0!	0	0	1	0	0	0	0	0	0	1	1	1	10290	34	260	82.4	9.3	27.957	8.86022	34.9	36.8	53	27	1.96296	3.3	2	0	1
8	3	M	58	J04.0	急性喉炎					140	95	110	91	18	0.65	36.7	98	181	85	25.9455	1	0	0	1	1	0	0	0	0	0	0	0	7000	45.4	112	70.3	21.4	5.23364	3.28505	19	0.19	17	12	1.41667	1.1	0	0	0
9	2	F	12	R05	咳嗽							0	156	22	#DIV/0!	37.6	100		35.6	#DIV/0!	1	1	1	0	0	1	0	0	0	0	0	0	12870	37.6	281	76.3	10.1	27.8218	7.55446	21.1	0.72	18	15	1.2	0.4	0	0	0
10	2	M	30	J39.9	上呼吸道疾病	J15.9	細菌性肺炎			150	81	104	90	18	0.6	36.9	99	187	86	24.5932	1	1	0	0	0	0	0	0	0	0	0	0	7620	42.2	148	71.3	21.5	6.88372	3.31628	16.2	0.03		26		0.6	1	0	0
11	3	F	55	J18.9	肺炎，未明示病原體	R50.9	發燒			147	77	100.333	97	16	0.659864	37.7	97	164	67	24.9108	1	1	0	0	1	0	0	0	0	1	0	0	14010	39.9	234	89.6	5.4	43.3333	16.5926	18.3	0.66	23	18	1.27778	0.6	1	0	0
12	3	M	64	R05	咳嗽					106	90	95.3333	72	16	0.679245	36.1	99	165	56	20.5693	1	0	1	0	0	0	0	0	0	0	0	0	8760	38.8	132	67.7	19.3	6.83938	3.50777	22.7	3.4	22	13	1.69231	0.8	1	0	0
13	3	F	51	R50.9	發燒	J18.9	肺炎，未明示病原體			137	85	102.333	106	16	0.773723	37.9	97	157	50	20.2848	1	1	1	1	0	0	0	0	0	0	0	0	11480	41.3	318	73	18	17.6667	4.05556	18.6	0.43		67		0.7	1	0	0
14	1	F	79	A41.9	敗血症，未明示病原體	R19.7	腹瀉			117	92	100.333	70	18	0.598291	39.3	88	154	65	27.4077	0	1	1	0	0	0	0	1	0	0	1	0	12750	39	145	91	2.3	63.0435	39.5652	23	25	56	21	2.66667	0.9	2	0	0
15	2	F	43	R50.9	發燒					108	85	92.6667	103	16	0.953704	38	98			#DIV/0!	1	1	0	0	0	1	1	0	0	1	0	0	7170	34.4	172	81.5	11.5	14.9565	7.08696	34.7	12.9	24	15	1.6	0.6	1	0	0
16	3	M	29	R50.9	發燒					116	86	96	117	22	1.00862	38.3	99			#DIV/0!	1	1	0	0	1	0	0	1	0	1	0	0	11000	40.5	239	76.9	9.9	24.1414	7.76768	20.9	2.02				1.3	1	0	0
17	3	M	25	J11.1	未確認流感病毒所致流行性感冒併其他呼吸道表徵					167	72	103.667	111	20	0.664671	36.7	99	170	92	31.8339	0	1	1	1	0	0	0	1	0	1	0	0	7150	42.5	187	71.3	15.5	12.0645	4.6	20.7	1.94	20	27	0.740741	1.1	1	0	0
18	3	F	29	J15.9	細菌性肺炎					112	51	71.3333	110	18	0.982143	37.7	100	158	46	18.4265	0	1	1	0	0	1	0	0	0	0	0	0	15910	39.9	310	79.3	10.8	28.7037	7.34259	22.5	7.57	19			0.6	1	0	0
19	3	F	21	J18.0	支氣管肺炎，未明示病原體					101	76	84.3333	132	18	1.30693	38.1	100	164	63	23.4236	1	1	1	1	1	0	0	0	0	0	0	0	12640	39.4	195	85.7	6.4	30.4688	13.3906	18.1	0.73	23			0.8	2	0	0
20	1	M	53	R06.09	其他形式呼吸困難	J18.9	肺炎，未明示病原體			186	96	126	136	30	0.731183	37.7	71	160	45	17.5781	0	1	1	0	0	1	0	0	0	0	0	0	10370	37.4	459	74.8	15	30.6	4.98667	21.3	13.96	15	56	0.267857	0.9	2	0	0
21	3	F	15	J15.8	其他特定細菌所致之肺炎	J90	肋膜積水，他處未歸類者			121	77	91.6667	96	19	0.793388	36.7	95	155	49	20.3954	0	1	1	0	0	1	0	0	0	0	0	0	14350	34.5	305	82	7.7	39.6104	10.6494	26.1	8.52	16	18	0.888889	0.3	1	0	0
22	3	M	90	J18.9	肺炎，未明示病原體					116	65	82	113	18	0.974138	37	94	166	60	21.7738	0	0	1	0	0	1	0	0	0	0	0	0	10230	39.8	242	76.4	11	22	6.94545	20.6	3.77	27			1.2	1	0	0
23	3	F	38	R50.9	發燒					141	93	109	119	16	0.843972	37.8	100	158	70	28.0404	0	1	0	0	0	0	0	0	0	1	0	0	8120	42.1	226	78.2	8.8	25.6818	8.88636	23.5	7.63				0.7	1	0	0
24	3	M	1	R50.9	發燒							0			#DIV/0!	37.8				#DIV/0!	1	1	0	0	0	0	1	0	0	0	0	0	9900	35.6	183	60	22.2	8.24324	2.7027	31.3	9.53	49			0.3	0	0	0
25	1	F	91	R06.00	呼吸困難					87	46	59.6667	143	8	1.64368	37.9	69			#DIV/0!	0	1	1	0	0	1	0	0	0	1	1	1	13710	34.6	290	82.2	15.9	18.239	5.16981	25.6	24.2	19			1.1	2	0	0
26	3	M	5	R50.9	發燒							0			#DIV/0!	37.1				#DIV/0!	1	1	0	0	0	0	0	0	0	1	0	0	8880	39.8	249	51.7	39	6.38462	1.32564	25.1	0.26				0.5	1	0	0
27	2	F	40	J18.9	肺炎，未明示病原體	R05	咳嗽			99	61	73.6667	98	19	0.989899	37	95			#DIV/0!	0	1	1	0	0	1	0	0	0	0	0	0	10760	34.7	253	71.7	6.8	37.2059	10.5441	23.3	3.78	10			0.6	2	0	0
28	2	F	23	J18.0	支氣管肺炎，未明示病原體	J40	支氣管炎，未明示急性或慢性者			124	82	96	124	16	1	38.3	100	155	48	19.9792	1	1	1	0	0	0	0	0	0	0	0	0	10520	39.1	215	81.8	9.7	22.1649	8.43299	21.7	18.75		11		0.7	1	0	0
29	3	M	87	N39.0	未明示部位之泌尿道感染症	R50.9	發燒			175	83	113.667	85	24	0.485714	39.3	99	160	58	22.6562	0	1	0	0	0	1	0	0	0	1	0	1	5170	33.2	229	85.8	7.5	30.5333	11.44	33	7.34	13			1.4	0	0	0
30	3	F	32	J18.9	肺炎，未明示病原體	R50.9	發燒			115	73	87	117	18	1.01739	38.6	98	162	70	26.6728	0	1	1	0	0	0	0	0	0	1	0	0	7750	35.6	247	71.7	16	15.4375	4.48125	26	4.97	52			0.8	1	0	0
31	3	M	57	R50.9	發燒					150	105	120	112	16	0.746667	38.7	99	164	65	24.1672	1	1	1	0	0	0	0	0	0	0	0	0	7320	46.5	139	78.3	9.7	14.3299	8.07216	26.7	2.94	38	80	0.475	1	0	0	0
32	3	M	43	R50.9	發燒					154	81	105.333	89	16	0.577922	36.9	99	185	75	21.9138	1	1	1	0	0	0	0	0	0	0	0	0	8570	45.2	202	73.9	17.6	11.4773	4.19886	20.3	13.31	20	18	1.11111	1.2	1	0	0
33	3	F	8	J40	支氣管炎，未明示急性或慢性者	J06.9	急性上呼吸道感染					0			#DIV/0!	36.7		130		0	1	0	0	1	0	0	0	0	0	0	0	0	8670	40.8	415	51	39.3	10.5598	1.29771	15.9	0.17	26	26	1	0.5	0	0	0
34	3	F	38	J10.1	其他確認流感病毒所致流行性感冒併其他呼吸道表徵					125	69	87.6667	85	16	0.68	36.9	100			#DIV/0!	0	1	1	0	0	0	0	0	0	0	0	0	9260	36.6	255	74.7	16.9	15.0888	4.42012	23	10.97		73		0.9	1	0	0
35	3	M	7	J06.9	急性上呼吸道感染	R05	咳嗽					0			#DIV/0!	36.8				#DIV/0!	1	0	1	0	0	0	0	0	0	0	0	0	11040	41	247	75.7	14.1	17.5177	5.36879	21.4	0.4	31	14	2.21429	0.5	1	0	0
36	3	M	85	J18.9	肺炎，未明示病原體	I10	本態性(原發性)高血壓			106	69	81.3333	95	17	0.896226	36.4	97	172	74	25.0135	0	1	1	0	0	0	0	0	0	1	0	1	7810	36.9	172	76.7	7.9	21.7722	9.70886	21.9	8.92	88	60	1.46667	1.5	1	0	0
37	3	F	65	R50.9	發燒					170	85	113.333	118	20	0.694118	39.2	96	167	80	28.6851	1	1	0	0	0	0	1	0	0	0	1	1	11620	33.6	144	76.5	10.9	13.211	7.01835	28.7	8.67		21		1.1	1	0	0
38	3	M	46	R50.9	發燒	N19	腎衰竭			147	85	105.667	78	18	0.530612	38	96	160	62	24.2188	0	1	1	1	0	0	0	0	0	0	1	0	6200	25.8	175	43.8	39.2	4.46429	1.11735	22.9	4.76		36		8.6	1	0	0
39	3	F	41	R50.9	發燒					127	96	106.333	94	18	0.740157	36.9	99	158	88	35.2508	1	1	0	1	0	0	0	0	0	0	0	0	9070	37.4	281	70.6	21.4	13.1308	3.29907	27.7	3.94		18		0.8	1	0	0
40	3	M	48	R50.9	發燒					136	101	112.667	119	18	0.875	37	100	172	70	23.6614	1	1	0	0	1	0	0	0	0	0	0	0	7190	50.5	307	74	13	23.6154	5.69231	24.2	7.94	61	69	0.884058	0.9	1	0	0
41	3	M	30	J10.1	其他確認流感病毒所致流行性感冒併其他呼吸道表徵					118	54	75.3333	112	18	0.949153	38.7	98	174	91	30.0568	1	1	1	0	0	0	0	0	0	1	0	0	11620	45.6	198	91.1	4.4	45	20.7045	19.6	1.87				1	0	0	1
42	3	F	43	R50.9	發燒					106	70	82	81	16	0.764151	36.5	100	167	50	17.9282	1	1	0	0	0	0	0	0	0	0	0	0	8200	41.7	243	66.9	25.2	9.64286	2.65476	18.5	0.03	20			0.6	1	0	0
43	3	F	67	J18.0	支氣管肺炎，未明示病原體					198	115	142.667	86	18	0.434343	36.9	100	158	61	24.4352	0	0	1	0	0	0	0	0	0	0	0	0	7790	41.1	261	65.6	26.7	9.77528	2.45693	17.6		53			1	0	0	0
44	3	M	87	J15.9	細菌性肺炎	R50.9	發燒			158	62	94	59	18	0.373418	37.4	98	175	72	23.5102	0	1	0	0	0	0	1	0	0	0	1	1	6440	20.6	99	68.6	20.2	4.90099	3.39604	24.3	3.32		31		2.1	1	0	0
45	3	F	20	R50.9	發燒					135	90	105	83	18	0.614815	37	96	169	66	23.1084	0	1	0	0	0	0	1	0	0	0	0	0	8610	46.3	301	64	29	10.3793	2.2069	15.8	0.09		11		0.7	0	0	0
46	2	F	56	J15.9	細菌性肺炎					136	91	106	137	20	1.00735	36.4	99	160	45	17.5781	0	0	1	0	0	0	0	0	0	0	0	0	10940	34.9	531	86.5	9.5	55.8947	9.10526	21	0.3		16		0.5	0	0	0
47	3	F	41	R50.9	發燒	J15.9	細菌性肺炎			132	90	104	119	18	0.901515	37.4	100	157	60	24.3418	0	1	1	0	0	0	0	0	0	0	0	0	5640	40.8	260	76.1	15.9	16.3522	4.78616	24.5	1.35		18		0.6	1	0	0
48	2	F	55	R50.9	發燒					128	91	103.333	124	18	0.96875	38.5	98	164	55	20.4491	0	1	0	0	0	0	0	0	0	1	0	0	8810	38	223	89.4	4.7	47.4468	19.0213	24.4	5.97	56	30	1.86667	0.6	0	0	0
49	3	M	31	J11.1	未確認流感病毒所致流行性感冒併其他呼吸道表徵	R50.9	發燒			140	90	106.667	90	18	0.642857	38.3	100			#DIV/0!	0	1	0	0	0	0	0	0	0	0	0	0	9090	46.2	257	72.7	18.9	13.5979	3.84656	17.9	0.26	25			1	0	0	0
50	3	M	26	Z04.8	來院接受其他特定理由之檢查及觀察					162	93	116	115	20	0.709877	36.6	98	170	64	22.1453	1	0	0	0	0	0	0	0	0	0	0	0	6260	46.7	281	69.7	23.7	11.8565	2.94093	16.5	0.1	19	12	1.58333	1	0	0	0
51	3	M	30	Z76.3	陪伴病患之健康者					131	83	99	95	18	0.725191	37.4	100	172	64	21.6333	1	1	0	0	0	0	0	0	0	0	0	0	5290	45.2	199	59.7	30.7	6.48208	1.94463	18.7	0.09	18	18	1	1	0	0	0
52	3	F	4	J18.0	支氣管肺炎，未明示病原體	R07.0	喉嚨痛					0			#DIV/0!	36.4				#DIV/0!	0	1	0	0	1	0	0	0	0	0	0	0	10510	38	334	83.8	12.8	26.0938	6.54687	21.9	0.65		21		0.5	1	0	0
53	3	F	45	J06.0	急性咽喉炎					110	73	85.3333	78	15	0.709091	36.8	100	163	54	20.3244	1	0	0	1	0	0	0	0	0		0	0	3200	39.1	215	53.9	35.2	6.10795	1.53125	22.4	0.06	18	15	1.2	0.8	0	1	0
54	3	F	26	R05	咳嗽					126	103	110.667	91	17	0.722222	36.5	98	161	56	21.6041	1	0	1	0	0	1	0	0	0	0	0	0	6150	34.3	234	58.9	23.8	9.83193	2.47479	17.5	0.4	13	7	1.85714	0.7	0	0	0
55	2	F	89	R05	咳嗽					157	70	99	122	24	0.77707	37.2	95	155	70	29.1363	0	0	1	0	0	1	0	0	0	0	0	0	5120	39.8	190	64	19.4	9.79381	3.29897	22	2.24		24		0.8	1	0	0
56	3	F	45	R19.7	腹瀉					146	83	104	118	18	0.808219	36.9	98	154	44	18.5529	0	0	0	0	0	0	0	1	0	1	0	0	3090	30.5	226	82.1	14	16.1429	5.86429	44.3	4.02	40	49	0.816327	0.4	1	0	0
57	3	M	33	J20.9	急性支氣管炎					139	85	103	95	18	0.683453	36.8	100	174	68	22.46	1	1	0	0	1	0	0	0	0	1	0	0	8700	45.2	267	80.5	12.9	20.6977	6.24031	19.2	1.03	26	28	0.928571	1.3	0	0	0
58	3	F	28	J04.0	急性喉炎					140	93	108.667	93	18	0.664286	36.5	100	160	55	21.4844	1	0	0	0	1	0	0	0	0	0	0	0	5890	40	246	47	38.1	6.45669	1.2336	18	0.03		10		1	0	0	0
59	3	M	14	J02.9	急性咽炎	J03.90	急性扁桃腺炎					0			#DIV/0!	36.3		141	32	16.0958	1	1	0	0	1	0	0	0	0	0	0	0	9100	39.4	269	62.3	29.3	9.18089	2.12628	15.5	0.03	25	17	1.47059	0.6	0	0	0
60	3	F	34	J06.0	急性咽喉炎	R19.7	腹瀉			138	63	88	80	18	0.57971	36.5	100	159	49	19.3821	1	1	0	0	1	0	0	1	0	0	0	0	6030	37.1	312	54.8	36	8.66667	1.52222	16.6	0.03		8		0.7	0	0	0
61	3	F	27	R05	咳嗽					127	91	103	110	20	0.866142	36.6	110	168	63	22.3214	1	0	1	0	0	0	0	0	0	0	0	0	5420	40.1	246	48.7	38.9	6.32391	1.25193	21.4	0.22	19	15	1.26667	0.6	0	0	0
62	3	F	34	J15.9	細菌性肺炎					126	74	91.3333	80	18	0.634921	36.7	100	166	62	22.4996	1	0	1	1	0	0	0	0	0	0	0	0	10460	40.4	307	70.8	18.6	16.5054	3.80645	17.5	0.11				0.6	0	0	0
63	3	F	32	R50.9	發燒	J18.8	其他肺炎，未明示病原體			153	93	113	86	18	0.562092	37.7	100			#DIV/0!	0	1	0	0	0	0	0	0	0	0	0	0	7540	39	473	68.1	25.6	18.4766	2.66016	18.1	0.03	20	10	2	0.7	0	0	0
64	3	F	26	R50.9	發燒					142	103	116	110	18	0.774648	37.4	100	157	49	19.8791	1	0	0	0	1	0	0	1	0	1	0	0	11110	41.9	201	82.8	10.2	19.7059	8.11765	19.2	3.95	15	10	1.5	0.7	0	0	0
65	3	F	35	J15.9	細菌性肺炎					127	89	101.667	129	17	1.01575	36.9	100	159	45	17.7999	1	0	0	0	1	0	0	0	0	1	0	0	4320	26.5	299	73.6	18.8	15.9043	3.91489	16.7	0.03	15	9	1.66667	0.6	0	0	0
66	3	F	30	J06.9	急性上呼吸道感染					112	62	78.6667	70	16	0.625	37.3	98	168	53	18.7783	1	0	0	0	1	1	0	0	1	0	0	0	7760	42.7	295	68.7	25.2	11.7063	2.72619	22.9	0.03	29	26	1.11538	0.6	0	1	0
67	3	F	30	J12.9	病毒性肺炎					107	70	82.3333	84	18	0.785047	36.7	99	158	50	20.0288	0	0	1	0	0	0	0	0	0	0	0	0	10750	40.6	267	76.8	17.3	15.4335	4.43931	18.5	0.03	18	15	1.2	0.6	0	0	0
68	2	F	22	R50.9	發燒					149	78	101.667	128	20	0.85906	39.6	100	165	100	36.7309	1	1	1	0	0	1	0	0	0	0	0	0	8750	38.5	231	73.2	15.2	15.1974	4.81579	23	0.37	17	22	0.772727	0.7	2	1	0
69	3	M	38	J06.9	急性上呼吸道感染	R07.9	胸痛			121	81	94.3333	104	16	0.859504	36.7	98	175	88	28.7347	1	0	0	1	0	0	0	0	0	0	0	0	8010	49.3	251	47.5	41.3	6.07748	1.15012	15.7	0.13	38	48	0.791667	1	0	0	0
70	2	M	77	J18.0	支氣管肺炎，未明示病原體	M79.1	肌痛			124	81	95.3333	152	18	1.22581	39.1	93	172	68	22.9854	0	1	0	0	0	0	0	0	0	1	0	1	7350	37.9	119	89.4	9	13.2222	9.93333	43.8	20.4		93		1.6	0	0	0
71	3	M	78	J40	支氣管炎，未明示急性或慢性者					142	72	95.3333	105	18	0.739437	37.6	97	165	60	22.0386	1	1	1	0	0	0	0	0	0	0	0	0	7670	38.9	335	73	13.6	24.6324	5.36765	18.8	0.35	22	16	1.375	0.6	0	0	0
72	3	F	32	R50.9	發燒	J15.9	細菌性肺炎			147	101	116.333	111	16	0.755102	39	99	158	51	20.4294	0	1	0	0	0	0	0	0	0	0	0	0	7850	41.7	249	81.7	11.4	21.8421	7.16667	25.5	0.4		15		0.6	0	0	0
73	3	M	20	R50.9	發燒					156	101	119.333	67	18	0.429487	36.4	100			#DIV/0!	0	1	0	0	1	0	1	0	0	0	0	0	8550	50.4	303	73.8	18.3	16.5574	4.03279	17.4	0.03	51	64	0.796875	0.9	0	0	0
74	3	M	86	J18.9	肺炎，未明示病原體	J40	支氣管炎，未明示急性或慢性者			154	71	98.6667	73	18	0.474026	36.4	99	166	79	28.6689	0	0	1	0	0	1	0	0	0	0	1	1	6880	41.1	170	69.1	17.3	9.82659	3.99422	18.2	0.12	20	20	1	1.2	1	0	0
75	3	M	30	J20.9	急性支氣管炎					186	105	132	119	18	0.639785	36.9	100	170	68	23.5294	0	0	0	0	0	0	0	0	0	0	0	0	5690	45.2	327	50.2	34.3	9.53353	1.46356	15.6	0.03	20	15	1.33333	1.1	0	0	0
76	3	M	32	J01.90	急性鼻竇炎					150	99	116	117	18	0.78	37	96	177	72	22.9819	0	0	0	0	0	0	0	0	0	0	0	0	6910	44.9	298	77.3	15.8	18.8608	4.89241	14.7	0.17	15	13	1.15385	0.9	0	0	0
77	2	F	82	J18.0	支氣管肺炎，未明示病原體	I51.9	心臟疾病			169	87	114.333	68	18	0.402367	36.2	92			#DIV/0!	0	0	0	0	0	0	1	0	0	1	0	1	9860	32.4	202	80.7	12.4	16.2903	6.50806	16.6	0.35		30		1.9	1	0	0
78	3	M	29	J04.0	急性喉炎					117	73	87.6667	101	18	0.863248	36.6	100	166	46	16.6933	0	0	0	0	0	0	0	0	0	0	0	0	6410	46.1	169	69.8	24	7.04167	2.90833	17.7	0.03	19	8	2.375	1	0	0	0
79	3	M	27	J04.0	急性喉炎					138	74	95.3333	88	17	0.637681	36.9	99	178	80	25.2493	0	0	0	0	0	0	0	0	0	0	0	0	6850	44	285	54.1	27.4	10.4015	1.97445	16.1	0.07	20	14	1.42857	0.9	0	0	0
80	3	F	33	J12.9	病毒性肺炎					129	92	104.333	115	18	0.891473	37.1	96	155	55	22.8928	1	1	1	0	0	0	0	0	0	0	0	0	5310	41	218	63.2	20.8	10.4808	3.03846	25.2	2.82	23	20	1.15	0.5	1	1	0
81	3	F	22	J84.2	淋巴間質性肺炎					119	78	91.6667	98	18	0.823529	36.8	100	160	53	20.7031	1	1	0	0	0	0	0	0	0	1	0	0	12730	42.5	350	77	15.5	22.5806	4.96774	22.5	0.03	15	12	1.25	0.7	0	1	0
82	2	F	21	J02.9	急性咽炎					151	100	117	123	18	0.81457	37.7	99	156	55	22.6003	1	1	0	0	1	0	0	1	0	0	0	0	7740	41.4	267	62.6	30.9	8.64078	2.02589	15.6	0.07	15	9	1.66667	0.8	0	0	0
83	3	F	56	J04.0	急性喉炎					183	110	134.333	105	18	0.57377	37.2	100	157	55	22.3133	1	0	0	0	1	0	0	0	0	1	1	1	7070	43.1	201	72.3	21.5	9.34884	3.36279	19.3	0.09	22	18	1.22222	0.7	0	0	0
84	3	F	29	J20.9	急性支氣管炎					129	71	90.3333	116	18	0.899225	36.8	98	162	53	20.1951	1	0	1	0	0	0	0	0	0	0	0	0	7390	42.7	328	71	22.6	14.5133	3.14159	18.3	0.04	16	14	1.14286	0.7	0	0	0
85	3	M	48	J20.9	急性支氣管炎					114	71	85.3333	113	18	0.991228	37.4	100	178	62	19.5682	1	0	1	0	0	0	0	0	0	0	0	0	7380	41.4	569	69.3	23.4	24.3162	2.96154	21.4	0.13	24	31	0.774194	0.7	1	0	0
86	3	F	50	J20.9	急性支氣管炎					120	72	88	90	18	0.75	37.8	96	162	52	19.8141	1	1	0	0	0	0	0	0	1	0	0	0	5150	39.3	201	65.8	24.5	8.20408	2.68571	26.1	0.99	25	34	0.735294	0.6	0	1	0
87	3	F	29	J20.9	急性支氣管炎					117	80	92.3333	88	16	0.752137	36.8	99	166	50	18.1449	1	0	1	0	1	0	0	0	0	0	0	0	8020	39.7	263	69.1	18.9	13.9153	3.65608	16.4	0.03	13	12	1.08333	0.6	0	0	0
88	3	M	61	J20.9	急性支氣管炎					128	102	110.667	86	18	0.671875	37.2	100	180	100	30.8642	1	1	1	0	0	1	0	0	0	0	0	0	9910	40.9	156	87.1	8.3	18.7952	10.494	21.3	5.02	24	17	1.41176	1.1	1	1	0
89	3	M	43	R50.9	發燒					163	102	122.333	106	16	0.650307	37	97	178	93	29.3524	1	1	0	0	1	0	0	1	0	0	0	1	9590	46.1	165	82.1	11.9	13.8655	6.89916	20.2	4.07	13	19	0.684211	1	0	0	0
90	3	F	3	J40	支氣管炎，未明示急性或慢性者							0			#DIV/0!	36.6		102	18	17.301	1	0	1	0	0	0	0	0	0	0	0	0	12890	39.4	338	51.3	36.7	9.20981	1.39782	16.7	0.04	38	33	1.15152	0.4	0	0	0
91	3	M	41	R50.9	發燒					112	83	92.6667	123	18	1.09821	39.1	95	171	105	35.9085	0	1	0	0	0	0	0	0	0	1	0	0	14960	45.2	206	81.9	9.4	21.9149	8.71277	18.1	1.39	43	57	0.754386	1	0	0	1
92	3	F	84	R50.9	發燒	J18.0	支氣管肺炎，未明示病原體			184	66	105.333	64	18	0.347826	39	98	168	66	23.3844	0	1	0	0	0	0	0	0	0	1	1	1	16700	32.2	202	83.1	10.3	19.6117	8.06796	23.2	1.5	23	16	1.4375	1.1	1	0	0
93	3	F	43	R50.9	發燒					182	115	137.333	114	18	0.626374	37.1	100	153	43	18.369	0	1	0	0	0	0	0	0	0	0	0	0	8650	50.1	212	72.2	23.6	8.98305	3.05932	19.2	0.03	20	16	1.25	0.7	0	0	0
94	2	M	28	J02.9	急性咽炎	K31.9	胃及十二指腸疾病			140	76	97.3333	148	18	1.05714	36.7	100	180	75	23.1481	0	0	1	0	1	0	0	1	0	0	0	0	12480	51.6	322	90	5.5	58.5455	16.3636	17.7	0.07	22	21	1.04762	1	0	0	0
95	2	M	36	R05	咳嗽					162	103	122.667	107	16	0.660494	36.8	96	167	98	35.1393	1	1	1	0	0	0	0	0	0	0	0	1	8170	41.6	297	70.1	19.3	15.3886	3.63212	20.6	0.47	27	49	0.55102	1.1	0	0	0
96	3	M	56	R50.9	發燒					156	92	113.333	107	18	0.685897	38.5	100	170	95	32.872	0	1	0	0	0	0	0	1	0	0	0	1	8510	43.5	188	86.4	6.9	27.2464	12.5217	27.5	4.27	24	32	0.75	1	1	0	0
97	3	F	35	R50.9	發燒					183	111	135	104	18	0.568306	37.3	100	156	62	25.4767	0	1	0	0	0	0	0	0	0	0	0	1	9120	39.5	239	64.8	26.1	9.15709	2.48276	21.1	0.05	17	14	1.21429	0.6	0	0	0
98	3	M	41	R68.83	寒顫(未伴有發燒)	M54.9	背痛			143	94	110.333	127	17	0.888112	37.3	97	175	80	26.1224	0	1	0	0	0	0	0	0	0	0	0	0	7830	46.6	209	85.6	9.7	21.5464	8.82474	17.7	0.14	23	28	0.821429	1	0	0	0
99	3	F	32	J11.1	未確認流感病毒所致流行性感冒併其他呼吸道表徵	R50.9	發燒			136	95	108.667	125	18	0.919118	36.7	100	159	65	25.711	0	1	1	1	1	0	0	0	0	1	0	0	16360	36.7	194	83.4	10.5	18.4762	7.94286	24.9	1.31	15	11	1.36364	0.5	0	0	0
100	3	F	21	R05	咳嗽					146	86	106	71	18	0.486301	37	99	158	50	20.0288	1	1	1	1	1	0	0	0	0	0	0	0	7150	41	255	54.8	36	7.08333	1.52222	18.2	0.03	33	29	1.13793	0.6	0	0	0
101	3	F	30	R50.9	發燒					123	85	97.6667	113	18	0.918699	38.3	100	156	54	22.1893	1	1	0	0	0	0	0	0	0	0	0	0	9390	36.4	221	85.7	7.5	29.4667	11.4267	28	12.5	23	17	1.35294	0.6	0	0	0
102	3	M	7	R50.9	發燒							0	133	17	#DIV/0!	39	98	126	32	20.1562	0	1	0	0	0	0	0	0	0	0	0	0	8390	34.8	518	41.5	46.9	11.0448	0.884861	27.9	2.55	82	101	0.811881	0.7	0	0	0
103	3	F	33	J06.9	急性上呼吸道感染					138	81	100	98	16	0.710145	36	96	171	78	26.6749	0	1	0	0	0	0	1	0	1	0	0	0	9640	40	256	71.6	19.5	13.1282	3.67179	20	0.45	15	18	0.833333	0.5	0	0	1
104	3	F	66	B34.2	未明示部位之冠狀病毒感染					145	83	103.667	60	18	0.413793	37	95	163	55	20.7008	1	0	0	0	0	0	0	0	0	0	0	0	6410	39.7	147	69	21.7	6.77419	3.17972	20.9	0.17	19	16	1.1875	0.7	0	1	0
105	3	F	34	J16.8	其他特定病原菌所致之肺炎	R05	咳嗽			144	84	104	109	18	0.756944	36.6	98	158	55	22.0317	1	1	1	0	1	0	1	0	0	0	0	0	6720	38.3	241	51.5	37.9	6.35884	1.35884	18.5	0.08	19	16	1.1875	0.6	0	0	0
106	3	F	55	R50.9	發燒	J11.08	未確認流感病毒所致流行性感冒併明示類型肺炎			178	117	137.333	86	19	0.483146	37.5	100	158	68	27.2392	0	1	0	0	0	0	0	0	0	1	0	0	10930	43.3	268	72.1	16.6	16.1446	4.34337	21.6	3.45	32	41	0.780488	0.7	0	0	0
107	2	M	62	R50.9	發燒					129	85	99.6667	149	18	1.15504	39	100	162	60	22.8624	0	1	0	0	0	0	0	1	0	1	0	0	7260	48.3	155	84.8	6.2	25	13.6774	29.4	5.98	15	21	0.714286	1.1	0	0	0
108	3	F	31	R10.9	腹痛	K65.8	其他腹膜炎			121	72	88.3333	82	18	0.677686	36.9	100	166	68	24.677	1	1	0	0	0	0	1	1	0	0	0	0	3540	37.6	194	72.1	15	12.9333	4.80667	30.4	14.27	16	10	1.6	0.7	0	0	0
109	3	M	33	J18.9	肺炎，未明示病原體					136	92	106.667	103	16	0.757353	36.2	100	176	80	25.8264	0	0	1	0	0	0	0	1	0	1	0	0	9710	40.4	360	62.5	25.5	14.1176	2.45098	19.1	4.08	33	52	0.634615	1.1	0	0	0
110	3	M	24	R50.9	發燒					153	85	107.667	94	18	0.614379	37.6	98	174	87	28.7356	0	1	0	0	0	0	0	0	0	0	0	0	8940	45.5	159	78.8	12.5	12.72	6.304	26.1	6.54	17	20	0.85	0.7	0	0	0
111	2	F	52	R50.9	發燒					131	78	95.6667	141	18	1.07634	39.1	100	164	83	30.8596	0	1	1	0	0	0	0	0	0	0	0	0	8590	33.1	186	88.7	8.6	21.6279	10.314	35.7	32.25	165	118	1.39831	0.7	1	0	0
112	3	M	20	J11.08	未確認流感病毒所致流行性感冒併明示類型肺炎					144	93	110	120	18	0.833333	36.6	99	170	67	23.1834	1	0	1	1	0	0	0	0	0	0	0	0	9610	44.7	199	70.5	24.3	8.1893	2.90123	19.3	0.03	13	21	0.619048	0.7	0	0	0
113	3	M	21	R50.9	發燒					109	63	78.3333	98	18	0.899083	37.6	98	173	57	19.0451	0	1	0	0	0	0	0	0	0	1	0	0	9050	41.6	194	80	9.3	20.8602	8.60215	25.1	2.58	16	12	1.33333	1	0	0	0
114	3	F	67	R50.9	發燒					176	88	117.333	95	16	0.539773	38.2	98	156	72	29.5858	1	1	1	0	0	0	0	0	0	0	0	1	14100	39.4	185	87.4	5.8	31.8966	15.069	20.5	0.16	25	22	1.13636	1	0	0	0
115	3	F	31	R05	咳嗽					138	94	108.667	85	16	0.615942	37	99	153	44	18.7962	1	1	1	1	0	0	0	0	0	0	0	0	6530	39.7	239	71.1	18.5	12.9189	3.84324	20	0.03	48	57	0.842105	0.6	0	0	0
116	2	M	23	R50.9	發燒	J11.08	未確認流感病毒所致流行性感冒併明示類型肺炎			149	72	97.6667	124	20	0.832215	36.6	100	175	69	22.5306	0	1	0	0	1	0	0	1	0	0	0	0	7970	49.2	172	78.9	11.7	14.7009	6.74359	24.9	3.01	23	38	0.605263	0.9	0	0	0
117	3	F	60	J11.08	未確認流感病毒所致流行性感冒併明示類型肺炎	M79.1	肌痛			127	78	94.3333	92	18	0.724409	36.1	99	157	45	18.2563	0	0	0	0	1	0	0	0	0	0	0	1	7320	40.5	245	67.5	21.1	11.6114	3.19905	19.8	0.06	21	12	1.75	0.7	0	0	0
118	3	F	22	J11.08	未確認流感病毒所致流行性感冒併明示類型肺炎	J02.9	急性咽炎			159	98	118.333	110	18	0.691824	36.7	99	160	68	26.5625	0	0	1	1	1	0	0	0	0	0	0	0	11940	47	334	70.1	21	15.9048	3.3381	17	0.15	16	16	1	0.7	0	0	0
119	3	F	45	M79.1	肌痛	R50.9	發燒			117	75	89	102	17	0.871795	36.6	100	160	50	19.5312	0	1	0	0	0	0	0	0	0	1	0	0	10620	44.7	223	87.7	6.4	34.8438	13.7031	20.9	1.1	17	11	1.54545	0.6	0	0	0
120	3	M	57	R50.9	發燒					147	99	115	105	18	0.714286	38.8	98	165	75	27.5482	0	1	0	0	0	0	0	0	0	0	0	1	7850	42	131	79.3	9.8	13.3673	8.09184	28.7	7.89	25	22	1.13636	1.2	1	0	0
121	3	M	31	R05	咳嗽	R19.7	腹瀉			122	92	102	101	18	0.827869	37	98	164	62	23.0518	0	1	1	0	0	0	0	1	0	0	0	0	8570	46.3	273	66.9	24.7	11.0526	2.7085	19.5	0.53	21	24	0.875	1.2	0	0	0
122	2	F	33	R50.9	發燒					132	76	94.6667	135	18	1.02273	37.7	97	158	100	40.0577	0	1	0	0	0	0	0	0	0	1	0	0	14120	41.3	248	85	8.7	28.5057	9.77011	25.9	1.64	24	26	0.923077	0.9	1	0	0
123	2	M	63	J15.9	細菌性肺炎					182	80	114	83	16	0.456044	37	98	177	85	27.1314	0	1	1	0	0	1	0	0	0	0	0	1	15580	43.3	282	76.1	13.7	20.5839	5.55474	16.9	0.3	36	30	1.2	1.1	0	0	0
124	3	F	42	R50.9	發燒					137	85	102.333	88	18	0.642336	36.6	100	160	52	20.3125	0	1	1	0	0	0	0	0	0	0	0	0	5210	35.6	201	59.9	32.9	6.10942	1.82067	17	0.07	16	15	1.06667	0.7	0	0	0
125	3	F	25	R50.9	發燒					142	98	112.667	114	18	0.802817	38.8	99	160	55	21.4844	0	1	0	0	0	0	1	1	0	0	0	0	13240	42.6	287	67.8	12.9	22.2481	5.25581	34.3	5.72	72	127	0.566929	0.8	0	0	0
126	1	M	46	R04.2	咳血					147	85	105.667	152	32	1.03401	38.6	88	180	91	28.0864	0	1	1	0	0	1	0	0	0	1	0	0	9050	40	437	78.9	8.1	53.9506	9.74074	23.1	17.2		38	0	1.1	1	0	0
127	3	M	35	R50.9	發燒					119	73	88.3333	91	18	0.764706	36	98	167	55	19.721	0	1	0	0	0	0	0	0	0	1	0	0	3890	41.9	161	49.3	33.9	4.74926	1.45428	17	0.56	51	54	0.944444	1	0	0	0
128	3	F	72	R05	咳嗽					158	80	106	106	18	0.670886	36.8	98	160	60	23.4375	0	1	1	0	0	0	0	0	0	0	1	1	10340	36.5	303	64.2	25.2	12.0238	2.54762	16.8	1.4	23	42	0.547619	1.1	0	0	0
129	3	M	26	J20.9	急性支氣管炎	J11.1	未確認流感病毒所致流行性感冒併其他呼吸道表徵			130	85	100	103	18	0.792308	37.7	100	176	70	22.5981	0	1	0	0	0	0	0	0	0	0	0	0	8360	43.8	247	71.9	16.5	14.9697	4.35758	18.4	1.5	20	16	1.25	1	0	0	0
130	3	M	48	J20.9	急性支氣管炎					192	119	143.333	121	16	0.630208	37.4	98	160	85	33.2031	0	0	1	0	0	0	0	0	0	0	0	1	13250	48.7	302	80.7	14.8	20.4054	5.4527	17.9	0.39	18	21	0.857143	1.2	0	0	0
131	3	F	29	J06.9	急性上呼吸道感染					118	63	81.3333	55	18	0.466102	36.7	100	158	47	18.8271	0	0	1	0	1	1	0	0	0	0	0	0	6530	41.6	261	51.9	31.8	8.20755	1.63208	20.8	0.03	19	9	2.11111	0.7	0	0	0
132	3	M	26	A09	感染性胃腸炎及大腸炎					91	54	66.3333	101	18	1.10989	37.9	98	175	72	23.5102	1	1	1	0	0	0	0	1	0	0	0	0	18040	45.7	112	92.1	3.5	32	26.3143	23	5.06	20	24	0.833333	1	0	0	0
133	3	M	1	K52.9	非傳染性胃腸炎及結腸炎	R50.9	發燒					0			#DIV/0!	38.8		87	13.5	17.8359	0	1	0	0	0	0	0	1	0	0	0	0	13830	36.9	244	53.6	38.3	6.37076	1.39948	35.5	3.65				0.3	0	0	0
134	3	F	27	R07.0	喉嚨痛	R42	頭暈及目眩			119	74	89	81	16	0.680672	36.8	97	170	94	32.526	0	0	0	0	1	0	0	0	0	0	0	0	13440	41	357	69.6	19.9	17.9397	3.49749	17.3	0.33	17	24	0.708333	0.6	1	0	0
135	3	M	60	R05	咳嗽					161	85	110.333	70	18	0.434783	36.6	98	155	55	22.8928	0	0	1	0	1	0	0	0	0	0	0	0	4920	46.1	215	66.1	23.6	9.11017	2.80085	18.4	0.03	23	23	1	1.1	0	0	0
136	2	F	93	R06.09	其他形式呼吸困難	J18.9	肺炎，未明示病原體			140	95	110	88	26	0.628571	36.9	94	155	48	19.9792	0	0	1	0	0	1	0	0	0	0	0	1	9140	34.4	242	87.1	5.4	44.8148	16.1296	16.3	0.76		14	0	0.6	0	0	0
137	2	F	25	J18.0	支氣管肺炎，未明示病原體	R51	頭痛			138	97	110.667	125	16	0.905797	36.7	99	158	48	19.2277	0	1	0	0	0	0	0	0	0	1	0	0	8890	40.9	255	69.7	21	12.1429	3.31905	18.4	0.04	25	16	1.5625	0.7	0	0	0
138	2	M	93	R50.9	發燒					122	68	86	83	16	0.680328	38.3	91	160	40	15.625	0	1	1	0	0	1	1	0	0	0	0	1	15280	44.1	188	85.1	5.8	32.4138	14.6724	16.5	6.32		46	0	1.5	1	0	1
139	1	F	88	J16.8	其他特定病原菌所致之肺炎	N39.0	未明示部位之泌尿道感染症			169	107	127.667	42	24	0.248521	38.3	71	154	51	21.5045	0	1	1	0	0	1	0	0	0	0	1	1	10670	36.4	184	77.3	14.5	12.6897	5.33103	26.3	0.33		15	0	1	1	0	0
140	2	M	86	R50.9	發燒	R06.00	呼吸困難			129	97	107.667	74	24	0.573643	38.6	96	168	55	19.487	0	1	1	0	0	1	0	0	0	0	0	1	14000	25.9	202	66.8	23.1	8.74459	2.89177	28.1	5.24	20	23	0.869565	3.8	2	0	0
141	3	M	0	J20.9	急性支氣管炎							0			#DIV/0!	36.1		60	6.3	17.5	1	0	1	1	0	0	0	0	0	0	0	0	10510	33.6	543	23.5	63	8.61905	0.373016	20.7	0.75					0	0	0
142	3	M	35	R05	咳嗽					152	94	113.333	77	18	0.506579	36.9	97	181	78	23.8088	1	0	1	0	0	0	0	0	0	0	0	0	7290	45.6	292	60.8	29	10.069	2.09655	17.2	0.17	19	22	0.863636	0.8	0	0	0
143	3	M	4	R05	咳嗽							0			#DIV/0!	36.3		105	17	15.4195	1	0	1	0	0	0	0	0	0	0	0	0	9190	35.9	438	55.7	35.9	12.2006	1.55153	17	0.08					0	0	0
144	3	M	25	J16.8	其他特定病原菌所致之肺炎					115	67	83	73	18	0.634783	36.3	98	172	76	25.6896	1	0	1	0	1	0	0	0	0	0	0	0	7380	43	232	53.8	25	9.28	2.152	22.6	2.63				0.9	1	0	0
145	3	M	45	R50.9	發燒					119	68	85	104	16	0.87395	38.5	100	178	89	28.0899	1	1	1	0	0	0	0	0	0	0	0	0	4940	38.5	227	72.2	11.8	19.2373	6.11864	22.2	1.5		30	0	1.1	1	0	0
146	3	M	39	R50.9	發燒	B09	皮膚及黏膜病灶為特徵未明示之病毒性感染(症)			115	62	79.6667	88	20	0.765217	37.6	100	181	71	21.6721	1	1	0	0	0	0	0	0	0	0	0	0	6390	41.2	75	86.9	5.6	13.3929	15.5179	31.7	8.52	17	43	0.395349	1.1	0	0	0
147	3	F	35	R50.9	發燒					113	81	91.6667	98	16	0.867257	36.6	98	157	47	19.0677	1	1	0	0	0	0	0	0	0	0	0	0	4400	41.5	343	51.4	16.3	21.0429	3.15337	26.8	0.21	23	21	1.09524	0.7	0	1	0
148	3	F	24	R50.9	發燒					122	79	93.3333	84	18	0.688525	36.8	95	158	84	33.6485	1	1	0	0	1	0	0	0	0	1	0	0	7670	41	275	59.7	32	8.59375	1.86563	26.8	0.04	40	61	0.655738	0.6	0	0	0
149	3	F	31	J40	支氣管炎，未明示急性或慢性者	R10.9	腹痛			169	113	131.667	101	18	0.597633	36.9	100	153	43	18.369	0	0	1	0	0	0	0	0	0	0	0	0	8570	39.6	188	77	18.4	10.2174	4.18478	17.1	0.04	19	7	2.71429	0.5	0	0	0
150	3	M	29	R50.9	發燒					144	89	107.333	91	18	0.631944	36.2	100			#DIV/0!	0	1	0	0	0	0	1	1	0	1	0	0	6330	49.3	194	61.1	31.1	6.23794	1.96463	17.7	0.07	14	24	0.583333	0.7	0	0	0
151	2	M	25							144	84	104	136	18	0.944444	38	100	175	60	19.5918	0	1	0	0	0	0	0	0	0	1	0	0	6430	46.3	202	79.6	7.9	25.5696	10.0759	23.3	0.73	18			1.2	0	0	1
152	2	M	17							168	118	134.667	155	18	0.922619	40.5	96	167	70	25.0995	0	1	1	0	0	0	0	0	0	1	0	0	8420	40.4	233	73.7	6.4	36.4062	11.5156	25.7	1.92				0.7	0	0	1
153	2	M	26							108	63	78	142	18	1.31481	39.9	98	170	62	21.4533	0	1	1	0	1	0	0	0	0	1	0	0	14480	41.9	237	84.8	8.8	26.9318	9.63636	23	1.62		21	0	0.8	0	0	1
154	3	F	53							174	85	114.667	107	17	0.614943	36	98	170	98	33.91	0	1	0	0	0	0	0	0	0	1	1	1	5290	41.9	240	80	8.7	27.5862	9.1954	20.1	1.57		118	0	0.8	0	0	1
155	3	F	2									0			#DIV/0!	39		100	14.5	14.5	0	1	1	0	0	0	0	0	0	0	0	0	6800	35.6	187	50.3	24	7.79167	2.09583	26	0.7		16	0	0.4	0	0	1
156	2	F	6									0	142	24	#DIV/0!	38.4	94	121	25	17.0753	0	1	1	0	0	1	0	0	0	1	0	0	10750	39	259	78.1	14.1	18.3688	5.53901	25	0.16	34			0.6	0	0	1
157	2	F	74							121	69	86.3333	132	20	1.09091	39	94	153	52	22.2137	0	1	0	0	0	0	0	0	0	1	0	0	9540	27.9	337	81.9	5.5	61.2727	14.8909	26.5	0.81	24			0.6	0	0	1
158	2	F	22							140	69	92.6667	137	18	0.978571	38.2	100	170	73.8	25.5363	0	1	0	0	0	0	1	0	0	1	0	0	12530	33.3	227	83.2	5.6	40.5357	14.8571	23.8	1.15		22	0	0.5	0	0	1
159	2	F	2									0			#DIV/0!	39.4			9		1	1	1	0	0	0	1	0	0	1	0	0	9600	36.5	236	74.8	14.6	16.1644	5.12329	24.3	0.32	44	17	2.58824	0.3	0	0	1
160	2	F	33							137	77	97	123	16	0.89781	38.3	100	164	53	19.7055	0	1	1	0	0	1	0	0	0	1	0	0	3600	40.9	149	67.7	21.5	6.93023	3.14884	26.6	1.62		11	0	0.8	0	0	1
161	3	M	67							127	83	97.6667	94	18	0.740157	40.1	100	173	75	25.0593	0	1	1	0	1	0	0	0	0	1	1	1	7410	43.4	143	76.7	9.1	15.7143	8.42857	22.7	2.02		24	0	1.4	0	0	1
162	3	M	32							133	90	104.333	95	18	0.714286	37.6	96	178	80	25.2493	1	1	1	0	0	0	0	0	0	1	0	0	6500	42.2	155	67.5	20.6	7.52427	3.2767	22.1	0.79	24	28	0.857143	1	0	0	1
163	3	M	61							168	82	110.667	88	18	0.52381	36.9	100	171	120	41.0383	1	0	1	0	0	1	0	0	0	0	1	1	8810	44.1	171	70	19.5	8.76923	3.58974	16.3	1.37		39	0	1.1	0	0	1
164	2	M	5									0	169	24	#DIV/0!	39.5		100	15	15	0	1	1	0	0	0	1	0	0	1	0	0	8440	40.7	149	81.3	9.6	15.5208	8.46875	24.3	2.1	32			0.4	1	0	1
165	3	M	48							138	80	99.3333	118	16	0.855072	37.4	100	182	90	27.1706	1	1	0	0	0	0	0	0	0	1	0	0	8540	44.2	243	62.3	23.5	10.3404	2.65106	25.9	1.72	32			1.2	0	0	1
166	3	M	41							108	70	82.6667	100	18	0.925926	37.6	100	172	64	21.6333	0	1	1	0	0	0	0	0	0	0	0	0	6760	45.1	145	67.1	21.3	6.80751	3.15023	22.4	3.48		32	0	1	0	0	1
167	1	F	84							125	64	84.3333	128	28	1.024	39.6	66				0	1	0	0	0	1	1	0	0	0	0	0	35830	43.7	933	72.1	21.9	42.6027	3.29224	39.3	3.51	50			0.3	2	0	1
168	3	F	82							165	54	91	106	22	0.642424	39.1	96	150	43	19.1111	0	1	0	0	0	1	0	0	0	1	1	1	8600	40.5	125	83.7	7.9	15.8228	10.5949	26.7	5.91		33	0	1	1	0	1
169	2	M	93							122	68	86	83	16	0.680328	38.3	91	160	40	15.625	0	1	0	0	0	0	1	0	0	0	0	1	15280	44.1	188	85.1	5.8	32.4138	14.6724	16.5	1.44		10	0	1.5	0	0	1
170	2	M	36							128	65	86	135	18	1.05469	37	97	177	89	28.4082	0	1	1	0	0	0	0	0	0	0	0	0	6980	41.3	185	79.1	9.7	19.0722	8.15464	24.8			26	0	0.8	0	0	1
171	2	M	91							146	66	92.6667	62	22	0.424658	36.8	97	162	53	20.1951	0	1	1	0	0	1	0	0	0	0	0	1	9800	42.1	176	83.8	7.2	24.4444	11.6389	21.9	5.39		21	0	1	0	0	1
172	3	F	61							167	82	110.333	125	20	0.748503	38.1	95	153	68	29.0487	0	1	1	0	0	0	0	0	0	0	1	1	9390	39.6	270	76.1	13.7	19.708	5.55474	22.7	1.19		47	0	0.8	0	0	1
173	3	M	46							145	76	99	118	20	0.813793	38.8	100	175	65	21.2245	0	1	1	0	1	0	0	0	0	0	0	0	7860	41.6	161	79.8	9.2	17.5	8.67391	21.8	1.49		18	0	1.1	0	0	1
174	3	F	74							147	72	97	95	17	0.646259	38.5	99				0	1	1	0	0	0	0	0	0	1	0	1	4970	37.9	164	74.4	10.8	15.1852	6.88889	27.2	2.76		12	0	0.7	0	0	1

## Sheet: 工作表2
病歷號碼	date	time	triage	病人姓名	採檢通報	gender	出生日期	age	icd10_code1	中文診斷1	icd10_code2	中文診斷2	icd10_code3	中文診斷3	compute_0029	收治科別	SBP	DBP	MAP	HR	RR	SI	BT	SpO2	Height	Weight	BMI	Travel	Fever	Cough	Rhinorrhea	Sorethroat	Dyspnea	Nausea	Diarrhea	olfactory or taste abnoraml	Malaise	DM	HTN	Lung dx	WBC	WBC2	Hct	Plt	N	L	MDW	MDW2	CRP
11747684	1090107	1909	2	廖政源		M		25								1	144	84	104	136	18	0.944444	38	100	175	60	19.5918	0	1	0	0	0	0	0	0	0	1	0	0	0	6430	2910	46.3	202	79.6	7.9	23.3		0.73
11867643	1090109	1953	2	張睿廷		M		17								1	168	118	134.667	155	18	0.922619	40.5	96	167	70	25.0995	0	1	1	0	0	0	0	0	0	1	0	0	1	8420		40.4	233	73.7	6.4	25.7		1.92
16562279	1090112	1357	2	楊玉新		M		26								3	108	63	78	142	18	1.31481	39.9	98	170	62	21.4533	0	1	1	0	1	0	0	0	0	1	0	0	0	14480	5480	41.9	237	84.8	8.8	23	23	1.62
5118904	1090112	1628	3	王立文		F		53								2	174	85	114.667	107	17	0.614943	36	98	170	98	33.91	0	1	0	0	0	0	0	0	0	1	1	1	0	5290		41.9	240	80	8.7	20.1		1.57
17484992	1090113	1059	3	高亦晴		F		2								1			0			#DIV/0!	39		100	14.5	14.5	0	1	1	0	0	0	0	0	0	0	0	0	0	6800		35.6	187	50.3	24	26		0.7
13713173	1090116	228	2	曾維瑀		F		6								2			0	142	24	#DIV/0!	38.4	94	121	25	17.0753	0	1	1	0	0	1	0	0	0	1	0	0	0	10750		39	259	78.1	14.1	25		0.16
17107837	1090117	400	2	王陳秀玉		F		74								1	121	69	86.3333	132	20	1.09091	39	94	153	52	22.2137	0	1	0	0	0	0	0	0	0	1	0	0	0	9540		27.9	337	81.9	5.5	26.5		0.81
196286	1090121	2100	2	曾子甯		F		22								1	140	69	92.6667	137	18	0.978571	38.2	100	170	73.8	25.5363	0	1	0	0	0	0	1	0	0	1	0	0	0	12530		33.3	227	83.2	5.6	23.8		1.15
16011357	1090125	2102	2	許瑀芯		F		2								2			0			#DIV/0!	39.4			9		1	1	1	0	0	0	1	0	0	1	0	0	0	9600		36.5	236	74.8	14.6	24.3		0.32
10700288	1090121	1733	2	鄧微		F		33								3	137	77	97	123	16	0.89781	38.3	100	164	53	19.7055	0	1	1	0	0	1	0	0	0	1	0	0	0	3600		40.9	149	67.7	21.5	26.6		1.62
10882054	1090109	2243	3	沈明倫		M		67								1	127	83	97.6667	94	18	0.740157	40.1	100	173	75	25.0593	0	1	1	0	1	0	0	0	0	1	1	1	1	7410		43.4	143	76.7	9.1	22.7		2.02
11328577	1090124	2103	3	楊博文		M		32								1	133	90	104.333	95	18	0.714286	37.6	96	178	80	25.2493	1	1	1	0	0	0	0	0	0	1	0	0	0	6500		42.2	155	67.5	20.6	22.1		0.79
12350551	1090125	150	3	徐英修		M		61								0	168	82	110.667	88	18	0.52381	36.9	100	171	120	41.0383	1	0	1	0	0	1	0	0	0	0	1	1	0	8810		44.1	171	70	19.5	16.3		1.37
12816581	1090106	707	2	謝以傑		M		5								2			0	169	24	#DIV/0!	39.5		100	15	15	0	1	1	0	0	0	1	0	0	1	0	0	0	8440		40.7	149	81.3	9.6	24.3		2.1
12873742	1090123	2038	3	王俊傑		M		48								1	138	80	99.3333	118	16	0.855072	37.4	100	182	90	27.1706	1	1	0	0	0	0	0	0	0	1	0	0	0	8540		44.2	243	62.3	23.5	25.9		1.72
15804075	1090105	834	3	索育廷		M		41								1	108	70	82.6667	100	18	0.925926	37.6	100	172	64	21.6333	0	1	1	0	0	0	0	0	0	0	0	0	0	6760		45.1	145	67.1	21.3	22.4		3.48
17471459	1090104	1922	1	王彩桂		F		84								1	125	64	84.3333	128	28	1.024	39.6	66				0	1	0	0	0	1	1	0	0	0	0	0	0	35830		43.7	933	72.1	21.9	39.3		3.51
3333068	1090112	1739	3	江麗華		F		82								4	165	54	91	106	22	0.642424	39.1	96	150	43	19.1111	0	1	0	0	0	1	0	0	0	1	1	1	0	8600		40.5	125	83.7	7.9	26.7		5.91
4022974	1090410	1714	2	李炳燭		M		93								0	122	68	86	83	16	0.680328	38.3	91	160	40	15.625	0	1	0	0	0	0	1	0	0	0	0	1	0	15280		44.1	188	85.1	5.8	16.5		1.44
4838104	1090104	1527	2	張立予		M		36								1	128	65	86	135	18	1.05469	37	97	177	89	28.4082	0	1	1	0	0	0	0	0	0	0	0	0	0	6980		41.3	185	79.1	9.7	24.8
5280757	1090123	1159	2	陳阿德		M		91								3	146	66	92.6667	62	22	0.424658	36.8	97	162	53	20.1951	0	1	1	0	0	1	0	0	0	0	0	1	1	9800		42.1	176	83.8	7.2	21.9		5.39
6213855	1090114	857	3	張昌琳		F		61								1	167	82	110.333	125	20	0.748503	38.1	95	153	68	29.0487	0	1	1	0	0	0	0	0	0	0	1	1	0	9390		39.6	270	76.1	13.7	22.7		1.19
6419730	1090107	1627	3	陳弘卿		M		46								1	145	76	99	118	20	0.813793	38.8	100	175	65	21.2245	0	1	1	0	1	0	0	0	0	0	0	0	0	7860		41.6	161	79.8	9.2	21.8		1.49
6794736	1090124	1002	3	崔陳玉雲		F		74								1	147	72	97	95	17	0.646259	38.5	99				0	1	1	0	0	0	0	0	0	1	0	1	0	4970		37.9	164	74.4	10.8	27.2		2.76
[truncated: 13 more columns]
